# Supplementary material for: T cell deficiency precipitates antibody evasion and emergence of neurovirulent polyomavirus
Source: eLife. 2022 Nov 7;11:e83030. doi: 10.7554/eLife.83030 (PMC9674346; doi:10.7554/eLife.83030)
Supplement: Figure 1—figure supplement 1—source data 1. [file elife-83030-fig1-figsupp1-data1.xlsx]

## Sheet: File info
	Figure 1_figure supplement 1_Source data 1
	Data for the graphs in the figure

## Sheet: Figure 1 S1A
			Figure 1_figure supplement 1_Source data 1
			Figure 1 S1A. VP1-specifc IgG 30 dpi
		Serum dilution	WT												μMT
		1/100	1.522	1.594	1.517	1.523	1.569	1.698	1.689	1.601	1.793	1.733	1.683	1.722	0.007	0.013	0.006	0.006	0.009	0.01	0.006	0.009	0.019	0.009
		1/200	1.572	1.598	1.547	1.586	1.653	1.629	1.646	1.675	1.793	1.716	1.672	1.651	0.007	0.009	0.006	0.007	0.008	0.008	0.007	0.009	0.013	0.007
		1/400	1.483	1.486	1.435	1.484	1.605	1.594	1.589	1.534	1.83	1.644	1.687	1.712	0.005	0.007	0.006	0.006	0.007	0.007	0.006	0.007	0.009	0.009
		1/800	1.505	1.464	1.504	1.505	1.618	1.489	1.573	1.57	1.582	1.675	1.628	1.598	0.006	0.007	0.006	0.007	0.006	0.007	0.007	0.007	0.008	0.007
		1/1600	1.389	1.348	1.346	1.41	1.514	1.445	1.486	1.553	1.579	1.608	1.568	1.57	0.007	0.006	0.006	0.007	0.007	0.006	0.007	0.007	0.008	0.007
		1/3200	1.306	1.315	1.201	1.336	1.434	1.327	1.411	1.379	1.506	1.55	1.444	1.52	0.006	0.005	0.005	0.009	0.006	0.007	0.005	0.007	0.007	0.007
		1/6400	1.097	1.196	1.197	1.199	1.385	1.257	1.273	1.342	1.433	1.449	1.368	1.431	0.006	0.005	0.005	0.005	0.006	0.006	0.006	0.006	0.007	0.006
		1/12800	0.862	0.951	0.959	1.003	1.165	1.033	1.066	1.135	1.271	1.292	1.166	1.276	0.005	0.007	0.006	0.005	0.007	0.006	0.006	0.007	0.006	0.006
		1/25600	0.657	0.722	0.724	0.807	0.964	0.787	0.748	0.932	1.005	1.073	0.924	1.111	0.005	0.006	0.005	0.006	0.006	0.006	0.005	0.006	0.007	0.006
		1/51200	0.376	0.456	0.476	0.574	0.772	0.505	0.493	0.675	0.74	0.816	0.667	0.849	0.005	0.005	0.005	0.006	0.005	0.005	0.006	0.006	0.006	0.006
		1/102400	0.197	0.281	0.268	0.359	0.45	0.296	0.283	0.424	0.465	0.546	0.402	0.538	0.006	0.006	0.006	0.006	0.006	0.007	0.006	0.007	0.007	0.007
		1/204800	0.113	0.074	0.159	0.202	0.259	0.161	0.174	0.213	0.294	0.37	0.227	0.326	0.006	0.005	0.007	0.006	0.006	0.007	0.006	0.007	0.008	0.007

## Sheet: Figure 1 S1B
			Figure 1_figure supplement 1_Source data 1
			Figure 1 S1B. Viremia at 30 dpi
			WT	μMT	μMT + VP1 mAb
			1	125000	1
			1	95000	1
			1	350000	1
			1	130000	1
			1	70000	1
			1	110000	1
			1	550000	1
			1	90000	1

## Sheet: Figure 1 S1C
			Figure 1_figure supplement 1_Source data 1
			Figure 1 S1C. Neutralization of A2 by sera from WT or VP1-mAb treated μMT mice
		Serum dilution	WT								μMT + VP1 mAb
		0.1	2.67e-05	5.173e-07	8.409e-05	2.623e-06	2.555e-06	0.0004075	0.0001645	0.0002472	1.405e-06	0.001262	7.792e-06	2.635e-06	1.636e-07	5.833e-07	1.814e-06	9.879e-06	1.742e-05
		0.01	0.00199	0.00219	0.006921	0.004098	0.00456	0.01305	0.001201	0.0001677	8.782e-05	6.444e-05	0.002525	2.08e-05	4.281e-05	0.003043	4.698e-05	1.733e-05	0.0002156
		0.001	0.00944	0.0181	0.07222	0.04299	0.04933	0.01359	0.1009	0.01761	0.05128	0.02758	0.001648	0.002429	0.00525	0.05259	0.0007216	0.003801	0.001318
		0.0001	0.27938	0.53584	0.6168	0.4432	0.3472	0.07193	0.1025	0.1437	0.3217	0.4368	0.2225	0.2678	0.146	0.491	0.04588	0.08308	0.1677
		1e-05	0.91836	0.95205	1.025	1.023	0.5314	0.5897	0.5134	0.6592	0.9335	0.864	0.5902	0.8019	0.5962	0.9962	0.799	0.5361	0.8056
		1e-06	0.9776	0.9249	1.285	0.7986	0.8236	1.024	0.7567	1.291	0.9777	0.7389	1.042	1.476	0.8616	0.9556	1.326	0.7598	0.8321

## Sheet: Figure 1 S1D
			Figure 1_figure supplement 1_Source data 1
			Figure 1 S1D. Neutralization of A2.Δ295 by sera from WT or VP1-mAb treated μMT mice
		Serum dilution	WT								μMT + VP1 mAb
		0.1	0.00063	0.00022	0.000235	0.000314	7.57e-05	0.000401	0.0048	0.000185	1.59	1.5	1.47	0.983	1.47	0.582	1.1	0.806	0.651
		0.01	0.0114	0.0043	0.00447	0.00411	0.00254	0.0513	0.3	0.00705	1.44	0.807	0.717	1.37	1.31	1.18	0.706	1.06	0.866
		0.001	0.13673	0.19714	0.166	0.0673	0.0354	0.0236	1.01	0.0102	0.932	0.786	0.756	1.27	0.917	0.598	0.562	0.491	0.753
		0.0001	0.64011	1.00542	0.476	0.482	0.38	0.369	1.14	0.349	0.934	0.928	0.862	0.543	0.883	1.45	0.793	0.683	0.767
		1e-05	0.897	0.99106	0.459	0.464	0.561	0.637	0.829	0.783	0.898	0.825	0.875	0.567	1.13	0.861	0.698	0.658	0.766
		1e-06	0.863	1.52	0.633	0.705	0.647	1.01	0.915	0.983	1	0.935	1.1	1.89	1.81	0.991	0.762	0.551	0.757

## Sheet: Figure 1 S1E
				Figure 1_figure supplement 1_Source data 1
				Figure 1 S1E. Neutralizing titers against A2 and A2.Δ295
			Virus	WT								μMT + VP1 mAb
			A2	4.253	3.952	4.113	4.005	4.774	4.934	4.789	5.134	4.213	3.989	5.116	5.169	4.711	4.004	4.899	4.727	4.288
			A2.Δ295	3.644	3.726	3.342	3.586	3.852	4.911	2.054	4.334
