# Supplementary material for: T cell deficiency precipitates antibody evasion and emergence of neurovirulent polyomavirus
Source: eLife. 2022 Nov 7;11:e83030. doi: 10.7554/eLife.83030 (PMC9674346; doi:10.7554/eLife.83030)
Supplement: Figure 1—figure supplement 2—source data 1. [file elife-83030-fig1-figsupp2-data1.xlsx]

## Sheet: File info
	Figure 1_figure supplement 2_Source data 1
	Data for the graphs in the figure

## Sheet: Figure 1 S2A
			Figure 1_figure supplement 2_Source data 1
			Figure 1 S2A. Number of kidney-infiltrating CD4 T cells
			WT	μMT + VP1 mAb
			33400	15100
			19800	22500
			23100	9680
			3530	17800
			1360	21100
			8490	14500
			5660	10000
			5660

## Sheet: Figure 1 S2B
				Figure 1_figure supplement 2_Source data 1
				Figure 1 S2B. Number of kidney-infiltrating CD8 T cells
				WT	μMT + VP1 mAb
				65900	34100
				42800	55500
				54300	21500
				6010	36200
				2440	49300
				17000	40800
				9750	31300
				10600
