# Supplementary material for: T cell deficiency precipitates antibody evasion and emergence of neurovirulent polyomavirus
Source: eLife. 2022 Nov 7;11:e83030. doi: 10.7554/eLife.83030 (PMC9674346; doi:10.7554/eLife.83030)
Supplement: Figure 1—figure supplement 3—source data 1. [file elife-83030-fig1-figsupp3-data1.xlsx]

## Sheet: Sheet1
	Figure 1_figure supplement 3_Source data 1
	Data for the graphs in the figure

## Sheet: Figure 1 S3B
		Figure 1_figure supplement 3_Source data 1
		Figure 1 S3B. Frequency of CD4+ cells of total CD45+ cells
			IgG	αCD4+αCD8β
			43.9	0.12
			58.1	0
			58.3	0
			61.1	0.44
			61.1	0.023
			52.9	0.015
			59.6	0
			61.9	0
			63.4	4.09
			53	0.26
			67.1	0
				0
				0

## Sheet: Figure 1 S3C
			Figure 1_figure supplement 3_Source data 1
			Figure 1 S3C. Frequency of CD8+ cells of total CD45+ cells
				IgG	αCD4+αCD8β
				34.8	1.74
				28.8	1.18
				29.7	0.6
				24.9	1.92
				23.1	0.56
				28.6	0.4
				33	0.47
				32.3	0.66
				28.7	6.43
				35.9	1.04
				25.2	2.53
					4.76
					1.2

## Sheet: Figure 1 S3E
			Figure 1_figure supplement 3_Source data 1
			Figure 1 S3E. Frequency of CD4+ cells of total CD45+ cells
				IgG	αCD4	αCD8β
				46.7	0.28	70.8
				55.2	0	67.2
				65.6	0	91.1
				55	0	73.5
				61.7	0	82.2
				58.9	0	92.5
				48.7	0	84.1
				49.9	0	84.8
				46.3	0	81.1
				43.3	0	81.1
				33.6	4.15	85.9
				39.7	0	57
				43.7	0	68.8
				51.2	0
				65.2	0.19
				49.8	0.023
				66.7	0
				44.2	0
				34.9	0
				55.4
				53.1

## Sheet: Figure 1 S3F
			Figure 1_figure supplement 3_Source data 1
			Figure 1 S3F. Frequency of CD8+ cells of total CD45+ cells
				IgG	αCD4	αCD8β
				32.8	57.5	0
				26.3	64.5	0.12
				20.3	43.5	0.17
				29.9	41.1	0.088
				22.8	69.9	0.19
				26.9	70.2	0.24
				31.4	63.4	0.17
				32	62	0.18
				34.3	54.2	0.29
				27.7	47.6	0.09
				34	45.3	0.67
				35.3	52.2	0.13
				27.9	49.6	0.074
				29.2	52.4
				23.6	54.8
				32.8	43.4
				19.2	42.9
				36.1	40.2
				35.9	36.1
				30.7
				27.3
