# Supplementary material for: T cell deficiency precipitates antibody evasion and emergence of neurovirulent polyomavirus
Source: eLife. 2022 Nov 7;11:e83030. doi: 10.7554/eLife.83030 (PMC9674346; doi:10.7554/eLife.83030)
Supplement: Figure 1—source data 1. [file elife-83030-fig1-data1.xlsx]

## Sheet: File info
	Figure 1_Source data 1
	Data for the graphs in the figure

## Sheet: Figure 1B
			Figure 1_Source data 1
			Figure 1B.Viral DNA levels in the kidney
					IgG	αCD4+αCD8β
					210973	9492035
					49838.3	64399835
					363383	16929757
					14701491	6359197
					5143872	3473984
					11826898	22728769
					11036438	7494139
					62321.6	166000000
					11337223	56293443
					51614765	76303188
					7658473	128000000
					22082104	54535370
					582281	14581858
					3827286	39767423
					1349401	59456.8
					302251	20114693
					381626	30783215
						53531528

## Sheet: Figure 1C
			Figure 1_Source data 1
			Figure 1C.Viral DNA levels in the kidney
				IgG	αCD4	αCD8β
				1566.54	8953.39	83411.2
				2719.55	112366	3313326
				1777067	44464978	5414496
				25740.9	67623553	2500015
				803906	29107710	4919860
				1653366	12628704	1173297
				507589	12140741	2380677
				874795	260665	52233.5
				2980234	25737935	3947054
				3477615	335991	1790637
				7109	7794006	200545
				1789899	20629.1	18143.4
				463423	14440178	25131.1
				723890	6310599
				1372.31	3659106
				8176.62	4469105
				452664	4007710
				286160	19841118
				2586084	167666
				550715
				24687414

## Sheet: Figure 1D
				Figure 1_Source data 1
				Figure 1D.Quantification of virus foci in the kidney
				IgG	αCD4+αCD8β
				0	0.5
				0	4.5
				0.5	4
				0	4
				1	3
				4.5	3
				1	5
				1.5	8
				0.5	4
				0	0
				2	1
				2.5	1
					9.5
