# Supplementary material for: T cell deficiency precipitates antibody evasion and emergence of neurovirulent polyomavirus
Source: eLife. 2022 Nov 7;11:e83030. doi: 10.7554/eLife.83030 (PMC9674346; doi:10.7554/eLife.83030)
Supplement: Figure 2—figure supplement 1—source data 1. [file elife-83030-fig2-figsupp1-data1.xlsx]

## Sheet: File info
	Figure 2_figure supplement 1_Source data 1
	Data for the graphs in the figure

## Sheet: Figure 2 S1A
			Figure 2_figure supplement 1_Source data 1
			Figure 2 S1A. Frequency of CD4+ cells of total CD45+ cells
			IgG	αCD4+αCD8β	αCD4	αCD8β
			37.5	0	0	58.6
			34.7	6.73	0	72.8
			20	0	0	49.9
			19	0.03	0	79.7
			54.6	0	0	54.9
			37.5	0	0	16.1
			48.4	0	0	56.4
			55.3	0	0	70.4
			48	0.06	0	74.7
			46.4	0	0
			50.3	0
			45	4.45
			37	6.8
			46.6	0.96
			51
			57.1
			57.3
			59.9
			40
			25.4
			30.9
			47.6
			39.6
			40.3
			39.6
			43.4
			42.4

## Sheet: Figure 2 S1B
			Figure 2_figure supplement 1_Source data 1
			Figure 2 S1B. Frequency of CD8+ cells of total CD45+ cells
				IgG	αCD4+αCD8β	αCD4	αCD8β
				35.8	2.67	27.2	0.06
				40.4	0.35	57.4	0.14
				20.7	0.14	27.4	0.54
				23.7	0.53	45.7	0.22
				31.8	0.22	38.6	0.21
				42.2	0.12	27.3	0.16
				26.3	0.4	40.8	0.077
				28.6	1.34	33.4	0.064
				31.9	0.99	46.6	0.29
				29.4	0.14	38.9
				33.3	0.12
				34.2	0.16
				33.4	0.1
				33.8	0.79
				31.6
				36.5
				28.6
				18.2
				24.9
				30.5
				27.3
				22.9
				34.8
				24.6
				34.6
				31.4
				29.9
