# Supplementary material for: T cell deficiency precipitates antibody evasion and emergence of neurovirulent polyomavirus
Source: eLife. 2022 Nov 7;11:e83030. doi: 10.7554/eLife.83030 (PMC9674346; doi:10.7554/eLife.83030)
Supplement: Figure 2—source data 1. [file elife-83030-fig2-data1.xlsx]

## Sheet: File info
	Figure 2_Source data 1
	Data for the graphs in the figure

## Sheet: Figure 2B (left)
				Figure 2_Source data 1
				Figure 2B left. Viral titers in the blood of control and T cell depleted mice over time
			Days Post Infection	IgG																											αCD4+αCD8β														αCD4
			20	1	1	1	1	1	1	1	1	1	1	1	1	1	1	1	1	1	1	1	1	1	1	1	1	1	1	1	1	1	1	1	1	1	1	1	1	1	1	1	1	1	1	1	1	1	1
			40	1	1	1	1	1	1	1	1	1	1	1	1	1	1	1	1	1	1	1	1	1	1	1	1	1	1	1	1	1	1	1	1	1	1	1	1	1	1	1	1	1	1	1	1	1	1
			60		1	1	1	1	1	1	1	1	1	1	1	1	1	1	1	1	1	1	1	1	1	1	1	1	1	1					55000	1	1	1	1	45000	1	1	1	1	500	1	1	1	1
			76	1																											1	27500	100000	50
			80		1	1	1	1	1	1	1	1	1	1	1	1	1	1	1	1	1	1	1	1	1	1	1	1	1	1					180000	20000		150		13500	50	1	3000	7000	24000	1	2000	1	1
			82																														330000
			100	1	1	1	1	1	1	1	1	1	1	1	1	1	1	1	1	1	1	1	1	1	1	1	1	1	1	1				25500	275000	400000		7500	40000			1	430000	245000	295000	1		100	1
			102																												7000	440000
			104																															75000
			120	1		1	1	1	1	350	1	1	1	1	1	1	1	1	1	1	1	1	1	1	1	1	1	1	1	1	210000											550	290000			1		4000	1
			127
			128																												65000
			140	1		1	1	1	1	4000	1	1	1	1	1	1	1	1	1	1	250	1	1	1	1	1	1	1	1	6000												250000	585000			15000		35000	20000
			75																																		170000
			112		1
			160	1		300	500	1	1	7500	1	1	1	1	1	1	4500	1	1	1	1	1	1	1	1	1	1	1	1	7000												230000						9000	2900
			180	1		1	1000	1	1	1000	1	1	1	1	1	1	18000	4500	1	1	300	1	1	1	1	1	15000	1	1	8000																			30000
			200	1000		150	500	1	1	1000	1	1	1	1	1	3000	7000	2000	1	1	1	1	1	1	1	1	17500	1	1	1000																			3500
			155																																											200000
			103																																			60000
			90																																					38000
			93																																						10000
			105
			170																																							335000
			154																																								450000
[truncated: 16 more columns]

## Sheet: Figure 2B (center)
				Figure 2_Source data 1
				Figure 2B Center. Peak levels of viremia detected in control and T cell depleted mice
				IgG	αCD4+αCD8β	αCD4	αCD8β
				1000	210000	295000	1
				1	440000	200000	65000
				300	330000	2000	1
				1000	75000	35000	1
				1	275000	30000	500
				1	400000	20000	1
				7500	170000	130000	550
				1	60000	115000	5000
				1	40000	370000	1
				1	45000	34500	1
				1	10000	160000
				1	335000
				3000	585000
				18000	245000
				4500
				1
				1
				300
				1
				1
				1
				1
				1
				17500
				1
				1
				8000

## Sheet: Figure 2B (right)
						Figure 2_Source data 1
						Figure 2B Right. Time to development of viremia in control and T cell depleted mice
					Days Post Infection	IgG	αCD4+αCD8β	αCD4	αCD8β
					102		1
					80		1
					80		1
					80		1
					60		1
					80		1
					75		1
					80		1
					80		1
					200	1
					112	0
					160	1
					160	1
					201	0
					201	0
					120	1
					201	0
					201	0
					201	0
					201	0
					201	0
					200	1
					60		1
					80		1
					60			1
					140			1
					80			1
					100			1
					140			1
					140			1
					100			1
					180				0
					60				1
					201				0
					201				0
					100				1
					160	1
					180	1
					201	0
					201	0
					140	1
					100			1
					100			1
					100			1
					100			1
					120		1
					80		1
					80		1
					201	0
					201	0
					201	0
					201	0
					201	0
					180	1
					201	0
					201	0
					140	1
					201				0
					140				1
					120				1
					201				0
					201				0

## Sheet: Figure 2C
		Figure 2_Source data 1
		Figure 2C. Viral DNA levels in the kidney
		IgG	αCD4+αCD8β	αCD4	αCD8β
		1777768	3408921	6820000	2130000
		429000	52559460	5280000	8730
		83600	75871850	1570000	193000
		305000	764455	42900000	16800000
		5620	1070000000	37000000	4620000
		55100	75637310	52400000	671000
		1570000	27986905	86000000	1440000
		7490	45091680	509000000	732000
		51900	89213690	1030000000	383000
		3380000	348000000	103000000
		23800	381000000	82838550
		281000	1240000000
		26400000	538000000
		6900000	135000000
		9580000
		30000
		74600
		19000000
		16700
		26800
		681000
		10600
		1130000
		30100000
		45600
		843000
		7770000

## Sheet: Figure 2D
			Figure 2_Source data 1
			Figure 2D. Viral DNA levels in the spleen
			IgG	αCD4+αCD8β	αCD4	αCD8β
			56203.1	311459	1530000	339000
			25600	2614403	186000	22700
			60500	6502713	123000	3950
			558000	60965.2	78600	141000
			3130	31847445	92400	21200
			4220	13444035	135000	6600
			398000	7576919	43300	682000
			6870	1115508	3670000	5930
			35000	4617993	4610000	61800
			344000	8170000	300000
			24400	3830000	152000
			5550	21700000
			129000	13400000
			117000	2130000
			146000
			46100
			21800
			30100
			111
			164
			1660
			93.4
			637
			274000
			853
			32200
			122000

## Sheet: Figure 2E
				Figure 2_Source data 1
				Figure 2E. Viral DNA levels in the brain
				IgG	αCD4+αCD8β	αCD4	αCD8β
				7086.15	316635	51700	22100
				10200	3196361	62000	1200
				2087.74	1625345	90300	459
				13064.5	278878	5170	20600
				1031.21	761952	15500	2740
				805.946	819784	7610	3710
				9696.24	3312416	179000	6970
				1866.03	1553360	48874.9	1350
				3193.87	2081684	9959.08	6330
				9551.82	530201	36606.3
				3659.67	138696	96595.2
				1086.35	416000
				22005.8	870000
				26864.3	58800
				77923
				1068.61
				2281.79
				1602.34
				360
				3970
				621
				907000
				276
				17000
				919
				589
				13700
