# Supplementary material for: T cell deficiency precipitates antibody evasion and emergence of neurovirulent polyomavirus
Source: eLife. 2022 Nov 7;11:e83030. doi: 10.7554/eLife.83030 (PMC9674346; doi:10.7554/eLife.83030)
Supplement: Figure 3—source data 1. [file elife-83030-fig3-data1.xlsx]

## Sheet: File info
	Figure 3_Source data 1
	Data for the graphs in the figure

## Sheet: Figure 3B
			Figure 3_Source data 1
			Figure 3B. VP1 mAb neutralization of VP1 mutant viruses
			IgG						VP1 mAb
		A2	1.06841	0.90601	1.03307	1.11209	0.98041	0.91717	1e-05	0.00082	0.00355	0.00041	3e-05	1e-05
		A2.Δ292/Y294H	0.63218	0.76539	2.06668	2.05228	0.37805	1.28889	1.14463	0.83772	0.1992	0.83968	0.53604	4.31493
		A2.Y294D	1.24185	0.84784	0.94977	1.13556	0.66196	1.33033	0.89534	1.09885	1.58799	0.47843	0.66278	1.17722
		A2.Δ294	1.08577	0.921	1.10817	1.13652	0.79399		0.38735	0.20188	0.20695	0.92009	0.13465	0.18556
		A2.Δ295	1.03635	1.26398	0.7634	1.09381	1.00047	0.91381	1.76	1.27418	1.23557	1.80984	0.90335	1.16844
		A2.D295A/Δ297	1.05579	1.06161	0.89219	1.40415	0.82578	0.86243	1.21725	1.15702	1.0484	1.2379	1.05851	1.19179
		A2.D295N/Δ297	1.37941	0.82931	0.87416	1.0695	1.06101	0.88125	1.01692	1.1727	1.06353	0.86254	0.61258	0.72324
		A2.V296F	1.01494	1.03128	0.9554	1.65489	1.22525	0.49318	1.27953	0.20726	1.3211	0.97693	0.89825	1.01048

## Sheet: Figure 3C
				Figure 3_Source data 1
				Figure 3C. Viral mRNA levels in the kidney
			A2	A2.Y294D	A2.Δ292/Y294H	A2.Δ295	A2.V296F	A2.D295A/Δ297	A2.D295N/Δ297
			17490.9	2271.42	1571.23	138870	1220.2	15282.4	33685
			48224.9	6488.8	8090.8	185915	1282.32	11934.2	27068.8
			54314.4	1197.97	2597	92968.8	1133.94	35600.2	34246.5
			25426.2	919.109	1726.99	95882.6	1384.59	2646.47	28956.7
			23733.6	6421.15	1748.35	30571.8	1992.89	1849.93	28125.5
			24848	837.108	4255.47	55258.9	1142.05	12557.3	26611.9
					1415.59	40367	1093.79	5850.17	24008

## Sheet: Figure 3D
			Figure 3_Source data 1
			Figure 3D. Viral mRNA levels in the spleen
			A2	A2.Y294D	A2.Δ292/Y294H	A2.Δ295	A2.V296F	A2.D295A/Δ297	A2.D295N/Δ297
			31622.5	3248.69	6649.06	10207.5	1071.25	6520.7	6159.61
			24995.1	4566.93	3437.29	8510.16	2266.51	6731.26	8840.63
			10544	3325.61	5868.49	11229.3	851.954	7732.57	10203.3
			19950.4	2699.84	5696.65	8271.85	2625.14	5328.64	3689.07
			23464.3	4834.38	4772.28	8503.55	2632.95	5385.58	5918.56
			14784.2	3565.43	5630.49	10929.1	1742.88	3275.2	5659.13
					7036.79	9733.7	1652.7	3088.62	5457.79
