# Supplementary material for: T cell deficiency precipitates antibody evasion and emergence of neurovirulent polyomavirus
Source: eLife. 2022 Nov 7;11:e83030. doi: 10.7554/eLife.83030 (PMC9674346; doi:10.7554/eLife.83030)
Supplement: Figure 4—figure supplement 1—source data 1. [file elife-83030-fig4-figsupp1-data1.xlsx]

## Sheet: File info
	Figure 4_figure supplement 1_Source data 1
	Data for the graphs in the figure

## Sheet: Figure 4 S1A
			Figure 4_figure supplement 1_Source data 1
			Figure 4 S1A. Frequency of CD4+ cells of total CD45+ cells
			IgG	αCD4+αCD8β
			56.4	0.22
			41.6	0.44
			46.7	0
			65.8	0
			48.8	0.72
			53.7	0
			46.8	0.039
			56.7	0
				0

## Sheet: Figure 4 S1B
			Figure 4_figure supplement 1_Source data 1
			Figure 4 S1B. Frequency of CD8+ cells of total CD45+ cells
			IgG	αCD4+αCD8β
			28.5	0.99
			35.3	1.33
			31.8	0.5
			25.9	0.84
			31.6	1.63
			31.9	1
			32.7	0.75
			28.2	0.88
				0.66
