# Supplementary material for: T cell deficiency precipitates antibody evasion and emergence of neurovirulent polyomavirus
Source: eLife. 2022 Nov 7;11:e83030. doi: 10.7554/eLife.83030 (PMC9674346; doi:10.7554/eLife.83030)
Supplement: Figure 4—source data 1. [file elife-83030-fig4-data1.xlsx]

## Sheet: File info
	Figure 4_Source data 1
	Data for the graphs in the figure

## Sheet: Figure 4B (left)
				Figure 4_Source data 1
				Figure 4B Left. Viral titers in the blood of control and T cell depleted mice over time
			Days post challenge	IgG								αCD4+αCD8β
			0	1	1	1	1	1	1	1	1	1	1	1	1	1	1	1	1	1
			7	1	1	1	1	1	1	1	1	50	1	50	1	1	1	1	1	300
			14	1	1	1	1	1	1	1	1	500	200	450	650	100	1	1500	50	25000
			21	1	1	1	1	1	1	1	1	15000	1500	16500	12500	5250	20000	30000	1400	110000
			28	1	1	1	1	1	1	1	1	55000	15000	280000	55000	42500	327500	267500	65000	390000

## Sheet: Figure 4B (center)
				Figure 4_Source data 1
				Figure 4B Center. Peak levels of viremia detected in control and T cell depleted mice
				IgG	αCD4+αCD8β
				1	55000
				1	15000
				1	280000
				1	55000
				1	42500
				1	327500
				1	267500
				1	65000
					390000

## Sheet: Figure 4B (right)
					Figure 4_Source data 1
					Figure 4B Left. Time to development of viremia in control and T cell depleted mice
				Days post Challenge	IgG	αCD4+αCD8β
				7		1
				7		1
				14		1
				14		1
				28	0
				28	0
				28	0
				28	0
				28	0
				28	0
				28	0
				14		1
				21		1
				14		1
				14		1
				7		1

## Sheet: Figure 4C
			Figure 4_Source data 1
			Figure 4C. Viral DNA levels in the kidney
			IgG	αCD4+αCD8β
			102650	26146436
			1427432	230000000
			937069	189000000
			2885278	911000000
			6651612	130000000
			55520.1	155000000
			58683.8	214000000
			2589118	81136653
				334000000

## Sheet: Figure 4D
					Figure 4_Source data 1
					Figure 4D. Viral DNA levels in the spleen
					IgG	αCD4+αCD8β
					8968.88	134414
					525.813	2280709
					3426.95	1779491
					837.416	54628251
					7154.4	6067353
					8517.67	19007903
					2441.39	21755227
					8851.97	2150208
						3677756

## Sheet: Figure 4E
			Figure 4_Source data 1
			Figure 4E. Viral DNA levels in the brain
			IgG	αCD4+αCD8β
			3185.51	24931.5
			16294.2	68554.5
			4758.02	128823
			4121.44	161691
			13174.6	338442
			10867.2	750348
			4952.93	250955
			1162.06	113380
				630786
