# Supplementary material for: T cell deficiency precipitates antibody evasion and emergence of neurovirulent polyomavirus
Source: eLife. 2022 Nov 7;11:e83030. doi: 10.7554/eLife.83030 (PMC9674346; doi:10.7554/eLife.83030)
Supplement: Figure 5—figure supplement 1—source data 1. [file elife-83030-fig5-figsupp1-data1.xlsx]

## Sheet: File info
	Figure 5_figure supplement 1_Source data 1
	Data for the graphs in the figure

## Sheet: Figure 5 S1A
					Figure 5_figure supplement 1_Source data 1
					Figure 5 S1A. Area of individual plaques
					A2	A2.D295N	A2.D295N/Δ297
					6390106	910028	1589164
					1492953	322131	2915905
					456872	4288259	2083539
					2540922	1494161	1836159
					5522501	4449784	751993
					5292832	3067835	1578388
					5449268	246527	1802722
					3726649	373524	2597685
					5026701	6708942	1007418
					1155605	2530546	1658131
					601925	4206282	1361150
					5265354	725452	963704
					555817	3449438	543608
					270161	1561717	4183541
					713815	1405794	1792371
					1378689	1354180	1969079
					7097822	5406098	620996
					1139164	2125399	1760936
					6509538	1770009	3090623
					4212397	3872052	2180712
					498987	507997	5707018
					1875129	311734	1326964
					1629041	4815158	948139
					5961583	2710639	4841066
					5655160	6902538	6611877
					4597939	4729647	877042
					4615587	1863507	1109834
					4952461	1264149	1844082
					7013217	2549783	2037583
					756989	856692	1034500
					1887846	6468099	2846117
					935146	429710	2182225
					1880663	2233849	1068372
					589783	7287814	1460450
					812668	6032009	1180426
					4815233	4244244	3128233
					4644734	2404210	2139600
					776551	4141251	1320140
					3884436	5761559	2904514
					1484230	5625228	3291814
					6855632	1913393	1630572
					1743699	368692	1002382
					6861561	1644287	4740311
					5130538	423102	1006504
					662484	3337492	1131372
					700377	844066	4144400
					4274197	2565505	5221556
					3218458	497331	3936362
					1499750	5334940	2293688
					3121946	1247973	1459587
					5380048	7138023	1549301
					531868	605062	1734744
					6591995	4801816	737194
					7171265	312925	344804
					716254	2488187	2121747
					4844233	1804756	2537036
					7179149	5757872	481540
					776818	2817465	564662
					5822144	4588104	3232337
					1443155	6493309	2458974
					4165186	2545842	627683
					5630846	1853714	509797
					4174050	3263948	1649631
					7389224	3117946	898442
					6406564	296885	2492064
					4188055	2322457	1216048
					893942	576416	786460
					1712705	4292853	1004521
					4164374	3651815	970864
					4657393	7050454	1739355
					2209581	3272365	3473149
					5905724	1216911	1165594
					3429725	6672304	730178
					452825	1789988	511001
					5438135	5799597	838367
					3837158	1406815	1980463
					5080352	4745099	1122933
					4848123	2612915	906940
					2018915	5945735	2472084
					2314201	5014588	1786349

## Sheet: Figure 5 S1B
			Figure 5_figure supplement 1_Source data 1
			Figure 5 S1B. Encapsidated genomes produced by WT and mutant viral DNA transfection
			A2	A2.Δ297	A2.D295N	A2.D295N/Δ297
			1.36167	1.65378	0.668641	9.28519
			0.833478	1.51694	0.475789	4.82255
			0.88112	1.7487	1.11277	7.10046
			2.01036	1.48084	2.85633	10.8928
			1.24888	3.9857	3.27506	15.5822
			0.398297	3.10972	7.18508	7.00333
			1.21614	1.70636	1.25111	1.58522
			0.847738	2.01335	1.04903	3.90003
			0.969963	0.7126	1.32568	3.82329

## Sheet: Figure 5 S1C
		Figure 5_figure supplement 1_Source data 1
		Figure 5 S1C. pH-dependent hemagglutination values for WT and mutant viruses
	pH	A2			A2.Δ297			A2.D295N			A2.D295N/Δ297
	6.5	64	128	128	1	1	1	8	8	8	256	256	256
	7	64	64	128	1	1	1	1	1	1	256	128	128
	7.5	32	32	64	1	1	1	1	1	1	128	128	128
	8	16	16	32	1	1	1	1	1	1	128	128	128
	8.5	8	8	16	1	1	1	1	1	1	128	128	128

## Sheet: Figure 5 S1D
			Figure 5_figure supplement 1_Source data 1
			Figure 5 S1D. Percent of virus binding lost with neuraminidase pre-treatment
			A2	A2.Δ297	A2.D295N	A2.D295N/Δ297
			77.8855	101.216	25.3027	95.4067
			84.952	101.811	30.1808	97.6737
			85.5635	87.2605	27.6886	93.362
			68.6381	86.1192	15.5559	73.835
			68.7754	81.0302	12.5167	73.216
			68.0801	80.0372	16.7697	69.7209

## Sheet: Figure 5 S1E
			Figure 5_figure supplement 1_Source data 1
			Figure 5 S1E. Percent of T antigen positive cells 24 hpi
		- Neuraminidase						+ Neuraminidase
	A2	61.2	69.4	65.9	56.4	59.9	59.2	1.2	1.15	0.73	0.71	0.67	0.75
	A2.Δ297	16	15.6	16.2	10.2	12	12.4	0.021	0.075	0.054	0.021	0.052	0.021
	A2.D295N	26	26.7	23.6	15.3	16	16.3	2.48	3.01	1.66	1.03	1.38	1.46
	A2.D295N/Δ297	59.7	58.9	61.6	56.6	60.9	59.1	2.96	2.49	3.64	2.15	2.29	2.57

## Sheet: Figure 5 S1F
			Figure 5_figure supplement 1_Source data 1
			Figure 5 S1F. LT mRNA levels with neuraminidase pretreatment
			- Neuraminidase						+ Neuraminidase
		A2	0.8773	1.2148	0.93831	0.90288	1.11054	0.99733	0.00443	0.00609	0.00788	0.01023	0.01055	0.00922
		A2.Δ297	1.00879	1.03275	0.95985	1.14198	0.67768	1.29216	0.00035	3e-05	0.00017	4e-05	0.00011	7e-05
		A2.D295N	1.08377	0.68968	1.33787	0.93785	1.14568	0.93068	0.08499	0.13377	0.09667	0.01891	0.06104	0.03137
		A2.D295N/Δ297	0.98736	0.99295	1.01999	1.01321	0.75327	1.31025	0.05728	0.01262	0.03867	0.02387	0.0457	0.03527
