# Supplementary material for: T cell deficiency precipitates antibody evasion and emergence of neurovirulent polyomavirus
Source: eLife. 2022 Nov 7;11:e83030. doi: 10.7554/eLife.83030 (PMC9674346; doi:10.7554/eLife.83030)
Supplement: Figure 5—source data 1. [file elife-83030-fig5-data1.xlsx]

## Sheet: File info
	Figure 5_Source data 1
	Data for the graphs in the figure

## Sheet: Figure 5A
		Figure 5_Source data 1
		Figure 5A. VP1 mAb neutralization assay with D295N and Δ297 VP1 mutant viruses
		IgG						VP1 mAb
	A2	1.18121	0.66121	1.28036	0.81932	0.92121	1.32491	7e-05	4e-05	3e-05	0.00024	0.00021	0.00014
	A2.Δ297	0.89019	1.25237	0.89698	1.03573	1.45214	0.66488	1.08677	0.88951	0.63591	1.12343	0.94086	0.76293
	A2.D295N	0.99976	0.86565	1.15548	0.73823	1.61714	0.83764	0.00099	0.0002	0.00036	0.00025	0.0002	0.0001
	A2.D295N/Δ297	1.02373	0.98874	0.98794	0.64874	1.15948	1.32944	0.92764	0.52849	1.60143	0.96482	0.49398	1.84241

## Sheet: Figure 5B
				Figure 5_Source data 1
				Figure 5B. Binding of VP1 mAb to WT or VP1 mutant viruses
				A2	A2.Δ297	A2.D295N	A2.D295N/Δ297
				1.02782	0.01757	1.66618	0.020498
				0.972182	0.023426	1.5754	0.026354
				1.03906	0.023438	1.58594	0.027344
				0.960938	0.027344	1.47266	0.023438

## Sheet: Figure 5C
				Figure 5_Source data 1
				Figure 5C. Binding avidity of VP1 mAb for A2 and A2.D295N
			[NH4SCN] (Molar)	A2				A2.D295N
			0	0.97511	0.948755	1.08594	0.945313	1.06775	0.97561	1.05236	0.996169
			0.25	0.887262	0.881406	0.925781	0.890625	0.957543	0.955736	0.988506	1.0166
			0.5	0.819912	0.761347	0.933594	0.859375	0.899729	0.977416	0.968072	0.996169
			1	0.658858	0.606149	0.820313	0.785156	0.820235	0.807588	0.93742	0.950192
			2	0.398243	0.36896	0.6875	0.640625	0.523939	0.484192	0.756066	0.771392
			3	0.219619	0.199122	0.449219	0.453125	0.225836	0.198735	0.49553	0.498084
			4	0.038067	0.035139	0.074219	0.070313	0.023487	0.023487	0.040868	0.040868

## Sheet: Figure 5D
				Figure 5_Source data 1
				Figure 5D. Quantification of virus production in a single round of replication by plaque assay
			A2	A2.D295N	A2.D295N/Δ297
			85	5	182.5
			85	9	197.5
			107.5	10.5	235
			75	11.75	197.5
			37.5	4.25	200
			52.5	6	290
			67.5	6.75	250
			50	7	220

## Sheet: Figure 5E
			Figure 5_Source data 1
			Figure 5E. Frequency of T antigen positive cells 24 hpi with WT or mutant viruses
		A2	A2.Δ297	A2.D295N	A2.D295N/Δ297
		20.1	19.8	3.35	49.6
		21.2	19.7	3.91	46
		15.6	22.7	3.77	45.3
		17.3	15.5	4	40.4
		23.7	12.5	5.51	44.7
		17.7	14.1	5.4	42.6
		17.5	12.9	10.8	49.4
		21.4	12.8	15.1	48.1
		14.7	13.9	12	45.6

## Sheet: Figure 5F
				Figure 5_Source data 1
				Figure 5F. Frequency of T antigen positive cells at 24, 48, 72, and 96 hpi
		hpi	A2													A2.Δ297													A2.D295N													A2.D295N/Δ297
		24	0.8	0.2	0.27	0.69	0.39	0.38	0.29	0.67	0.66					0.067	0.14	0.16	0.17	0.033	0.022	0.14	0.11	0.15					0.1	0.079	0.38	0.16	0.1	0.17	0.2	0.12	0.43					2	2	1.95	3.94	2.03	3.48	1.9	1.79
		48	1.03	1.97	2.13	0.93	0.83	0.67								0.13	0.096	0.14	0.24	0.21	0.24								0.097	0.077	0.097	0.4	0.39	0.36								10.9	10.2	5.72	2.85	3.37	4.91
		72	1.46	0.78	1.76	1.51	0.81	1.28	1.88	1.35	2.17					0.11	0.061	0.061	0.14	0.13	0.18	0.13	0.059	0.29					0.28	0.18	0.17	0.14	0.17	0.17	0.62	0.52	0.39					19.1	15.4	21.9	17.8	15.9	18.6	18.4	16.8
		96	40.1	33	40.5	26.6	18.3	31.1	8.64	5.78	8.99	18.5	17.9	18.7	17.7	2.01	0.96	1.32	0.34	0.24	0.2	0.27	0.17	0.14	1.72	1.06	1.01	1.75	22.9	19.4	19.3	5.31	4.44	2.49	1.62	0.67	1.01	10.3	8.62	6.23	7.24	38.9	36	38.2	44.5	40.7	39	28.6	26.4
[truncated: 5 more columns]

## Sheet: Figure 5H
				Figure 5_Source data 1
				Figure 5H. LT mRNA levels in the kidney 4 dpi with WT or mutant viruses
				A2	A2.Δ297	A2.D295N	A2.D295N/Δ297
				98743.2	4034.29	1264.12	12800.9
				21134.8	981.703	1331.73	23121.6
				45564.2	3417.78	134.627	10054.2
				28372	1108.18	5722.76	35275
				63522.4	1326.44	4186.39	94379.5
				110382	1863.75	637.444	26575.6
				113253	7008.52	522.53	10992.1
				10419.8	2433.8	535.277	15680.1
				873.044	2218.84	501.709	8798.97
				11285.5

## Sheet: Figure 5I
			Figure 5_Source data 1
			Figure 5I. Frequency of D295 and H297 mutations in the kidney
				αCD4 + αCD8β - D295N/Δ297	αCD4 + αCD8β - D295A/Δ297	αCD4 - D295N/Δ297
			WT	37	23	30
			Δ297	9	26	17
			D295N(A)	0	0	0
			D295N(A)/Δ297	4	1	3
