# Supplementary material for: T cell deficiency precipitates antibody evasion and emergence of neurovirulent polyomavirus
Source: eLife. 2022 Nov 7;11:e83030. doi: 10.7554/eLife.83030 (PMC9674346; doi:10.7554/eLife.83030)
Supplement: Figure 6—source data 1. [file elife-83030-fig6-data1.xlsx]

## Sheet: File info
	Figure 6_Source data 1
	Data for the graphs in the figure

## Sheet: Figure 6A
				Figure 6_Source data 1
				Figure 6A. Viremia in μMT mice 30 dpi with A2 or A2.D295N/Δ297
				A2	A2.D295N/Δ297
				140000	100000
				112500	90000
				117500	45000
				70000	42500
				110000	23750
				80000	50000
				47500	82500
				80000	152500
				112500	60000

## Sheet: Figure 6D (left)
				Figure 6_Source data 1
				Figure 6D. Quantification of the number of VP1+ foci in kidneys
				A2	A2.D295N/Δ297
				22.5	6
				26.5	1.5
				25.5	4
				28	3
				23	1.5
				24.5	3
				27.5	3
				39	3
				28.5	1.5

## Sheet: Figure 6D (right)
			Figure 6_Source data 1
			Figure 6D. Quantification of the size of VP1+ foci in kidneys
			A2	A2.D295N/Δ297
			16055.5	661.348
			18958.5	1300.32
			16836.6	9232.37
			72848.2	1877.77
			17802.6	1004.16
			17053.4	1158.91
			24571.7	390.085
			13472.8	739.023
			18053.4	518.942
			53167.6	261.729
			38889.9	35747.5
			14527.5	3194.84
			16104.7	22032.4
			30535.1	13892.9
			11413.3	22349.7
			13304.3	2384.66
			35719.1	7790.76
			6898.09	216.268
			24326.2	742.034
			20106.1
			73870.6	1143.16
			26455.5	17325.2
			38527.2	406.443
			5330.02	1094.79
			4042.45	469.466
			55958.2	80693.9
			52393.5	3170.45
			43608.4	1287.67
			13299.8	1318.78
			69300.1	4874.3
			33496.9	16907.2
			30991	10538.8
			2466.36	7838.32
			32194.2	6277.38
			44408.6	3132.52
			27468.6	1646.64
			38722.4	838.878
			31333	2029.7
			20144.9	2354.16
			32953.8	8996.24
			10194.3	17001.3
			11778.7	1252.04
			54527.5	7130.81
			60551.7
			19632.8

## Sheet: Figure 6E
		Figure 6_Source data 1
		Figure 6E. Quantificationof VP1+ cells in the third ventricle
		A2	A2.D295N/Δ297
		0	0
		0	32
		0	25
		0	7
		0	0
		0	95
		1	33
		2	112
		0	6
		0	29
		0	12
		0	9
		0	0
		0	15
		1	30
		0	39
		0
		0

## Sheet: Figure 6H
			Figure 6_Source data 1
			Figure 6H. Quantification of hydrocephalus 30 dpi
			Sham	A2	A2.D295N/Δ297
			9	9.5	10.5
			9.5	9.5	10.5
			9	9	10
			9	9.5	11
			9	9.5	10.5
			9	10	10.5
			9	9.5	10.5
			9.5	10	11
			8.5	9.5	10.5
			9	10.5	11.5
				10.5	10.5
				10.5	11
				10
