# Supplementary material for: T cell deficiency precipitates antibody evasion and emergence of neurovirulent polyomavirus
Source: eLife. 2022 Nov 7;11:e83030. doi: 10.7554/eLife.83030 (PMC9674346; doi:10.7554/eLife.83030)
Supplement: Supplementary file 1. — Identity, location, and frequency of detected VP1 mutations. Superscripted numbers indicate the VP1 loop in which the mutations are located (1: BC, 2: DE, 3: EF, 4: HI). Deletions are indicated by a “Δ” followed by the deleted residues; the identity of the deleted amino acids is indicated in “()”. The duplication of a residue is indicated with “dup.” The presence of two mutations in a virus is indicated with “+”. Sets of mutations separated by “and” indicate that both of the listed mutant viruses were isolated from the same mouse. [file elife-83030-supp1.docx]

| **Condition** | **VP1 Mutation** | **Loop** | **# of mice** |
| --- | --- | --- | --- |
| **IgG** | **E68K1 + Δ297(H)4**  **and**  **N149K2 + Δ297(H)4** | **BC1 + HI4**  **and**  **DE2 + HI4** | **1** |
| **E87K1 + Δ297(H)4** | **BC1 + HI4** | **1** |
| **E91V1 + Δ297(H)4** | **BC1 + HI4** | **1** |
| **Δ145-150(TDTVNT) + Δ294(Y)4** | **DE2 + HI4** | **1** |
| **E187K3 + Δ297(H)4** | **EF3 + HI4** | **1** |
| **Δ294(Y)4** | **HI4** | **1** |
| **Δ295(D)4** | **HI4** | **2** |
| **D295N4 + Δ296(F)4** | **HI4** | **1** |
| **V296F4** | **HI4** | **1** |
| **αCD4 + αCD8** | **I79S1 + Δ295(D)4**  **and**  **N80K1 + Δ295(D)4** | **BC1 + HI4** | **1** |
| **K151dup2 + Δ297(H)4** | **DE2 + HI4** | **1** |
| **Δ292(R)4 + Y294H4** | **HI4** | **1** |
| **Y294D4** | **HI4** | **1** |
| **Δ295(D)4** | **HI4** | **7** |
| **D295A4 + Δ297(H)4** | **HI4** | **2** |
| **D295N4 + Δ297(H)4** | **HI4** | **1** |
| **αCD4** | **E68K1 + Δ297(H)4** | **BC1 + HI4** | **1** |
| **E87K1 + Δ297(H)4** | **BC1 + HI4** | **1** |
| **Δ147-148(TV)2 + Δ297(H)4**  **and**  **D295N4 + Δ297(H)4** | **DE2 + HI4**  **and**  **HI4** | **1** |
| **N293K4 + Δ297(H)4** | **HI4** | **2** |
| **N293K4 + Δ298(H)4** | **HI4** | **2** |
| **Δ295(D)4** | **HI4** | **2** |
| **D295A4 + Δ297(H)4** | **HI4** | **1** |
| **D295N4 + Δ297(H)4** | **HI4** | **1** |
| **αCD8** | **Δ295(D)4** | **HI4** | **4** |
